# Supplementary material
Source: PubMed Central journal article supplement (PMC3529965)
Supplement: NIHMS396734-supplement-1_si_001.pdf [file NIHMS396734-supplement-1_si_001.pdf]

## SUPPORTING INFORMATION

**Table SI1 Alanine transaminase (ALT) and aspartate transaminase (AST) of plasma collected from rats treated with acoustic pulses involving various inter-pulse periods (IPP).**

| Enzyme Activity (IU/L) at Indicated Inter-Pulse Period |          |           |          |          |          |         |
|--------------------------------------------------------|----------|-----------|----------|----------|----------|---------|
|                                                        | 72 ms    | 400 ms    | 800 ms   | 2000 ms  | 4000 ms  | Control |
| ALT                                                    | 90 ± 70  | 118 ± 120 | 159 ± 97 | 127 ± 40 | 180 ± 82 | 45 ± 8  |
| AST                                                    | 205 ± 30 | 225 ± 102 | 239 ± 75 | 217 ± 69 | 236 ± 58 | 87 ± 21 |

**Table SI2 Alanine transaminase (ALT) and aspartate transaminase (AST) of plasma collected from rats treated with various pulse-train US exposure regimens. ('m,n': US pulsing 'on' time, 'off' time; C+:continuous US with PFR 13.9 Hz, C+':continuous US with PFR 55.6 Hz; details shown in Table 2)**

| Enzyme Activity (IU/L) at Indicated pulse-train US exposure regimens |          |            |            |            |            |           |            |            |            |            |
|----------------------------------------------------------------------|----------|------------|------------|------------|------------|-----------|------------|------------|------------|------------|
|                                                                      | C+       | '1 s, 2 s' | '2 s, 2 s' | '2 s, 3 s' | '3 s, 2 s' | C+'       | '1 s, 2 s' | '2 s, 2 s' | '2 s, 3 s' | '3 s, 2 s' |
| ALT                                                                  | 65 ± 22  | 60 ± 15    | 63 ± 23    | 84 ± 29    | 72 ± 35    | 117 ± 35  | 73 ± 16    | 80 ± 24    | 80 ± 16    | 74 ± 16    |
| AST                                                                  | 215 ± 61 | 206 ± 43   | 220 ± 68   | 228 ± 61   | 242 ± 68   | 344 ± 116 | 240 ± 41   | 235 ± 48   | 227 ± 37   | 245 ± 32   |

**Table SI3 The extents of hepatic necrosis damage on day 1 from variable treatments (150 µg plasmid).**

| MB concentration | US PNP (MPa)     | Necrotic area / total area |
|------------------|------------------|----------------------------|
| 0                | 0                | 0                          |
| 10%              | 0                | 0                          |
| 0                | 2.7              | 1.5%                       |
| 0.5%             | 2.7              | 6.0%                       |
| 1.5%             | 2.7              | 6.8%                       |
| 10%              | 1.0              | 3.7%                       |
| 10%              | 2.0              | 9.1%                       |
| 10%              | 2.7              | 10.4%                      |
| 10%              | 3.3              | 14.6%                      |
| 10%              | 2.7(pulse-train) | 5.1%                       |

**Table SI4 Summary of various animal experiments.**

| Experiment                                                                    | Number of groups | Animal numbers per group |
|-------------------------------------------------------------------------------|------------------|--------------------------|
| Comparison of gene transfer enhancement with focused and unfocused transducer | 3                | 8                        |
| Gene delivery mediated by US with MBs                                         | 4                | 6                        |
| Dependence of transgene expression on MBs concentration                       | 8                | 6                        |
| Gene transfer efficiency upon various US peak negative pressures (PNP)        | 6                | 7-9                      |
| Effect of inter-pulse period of US on gene transfer efficiency                | 5                | 6                        |
| Effect of pulse train US exposure on gene transfer efficiency                 | 10               | 6-7                      |
| Histological assay for liver damage                                           | 2                | 15                       |
